# Supplementary material for: Toward high efficiency organic photovoltaic devices with enhanced thermal stability utilizing P3HT-b-P3PHT block copolymer additives
Source: Royal Society of Chemistry journal article supplement (doi:10.1039/c6ta08181a), 2016-01-01
Supplement: c6ta08181a1.pdf [file c6ta08181a1.pdf]

## Supporting Information

# Toward High Efficiency Organic Photovoltaic Devices with Enhanced Thermal Stability Utilizing P3HT-*b*-P3PHT Block Copolymer Additives

*Mingjing Zhu,<sup>1,§</sup> Heejun Kim,<sup>2,§</sup> Yu Jin Jang,<sup>2</sup> Sungmin Park,<sup>3</sup> Du Yeol Ryu,<sup>3</sup> Kyungkon Kim,<sup>2</sup> Ping  
Tang,<sup>1</sup> Feng Qiu,<sup>1</sup> Dong Ha Kim,<sup>2,4\*</sup> and Juan Peng<sup>1\*</sup>*

<sup>1</sup>State Key Laboratory of Molecular Engineering of Polymers, Collaborative Innovation Center of  
Polymers and Polymer Composite Materials, Department of Macromolecular Science, Fudan  
University, Shanghai 200433, China

<sup>2</sup>Department of Chemistry and Nano Science, College of Natural Sciences, Ewha Womans University,  
Seoul 03760, Republic of Korea

<sup>3</sup>Department of Biological and Chemical Engineering, Yonsei University, 50, Yonsei-ro, Seodaemun-  
gu, Seoul 03722, Korea

<sup>4</sup>Division of Chemical Engineering and Materials Science, College of Engineering, Ewha Womans  
University, 52, Ewhayeodae-gil, Seodaemun-gu, Seoul 03760, Korea

§ These authors contributed equally to this work.

### Corresponding Author

\*E-mail: [juanpeng@fudan.edu.cn](mailto:juanpeng@fudan.edu.cn) (J. P.) ; [dhkim@ewha.ac.kr](mailto:dhkim@ewha.ac.kr) (D. H. K.)

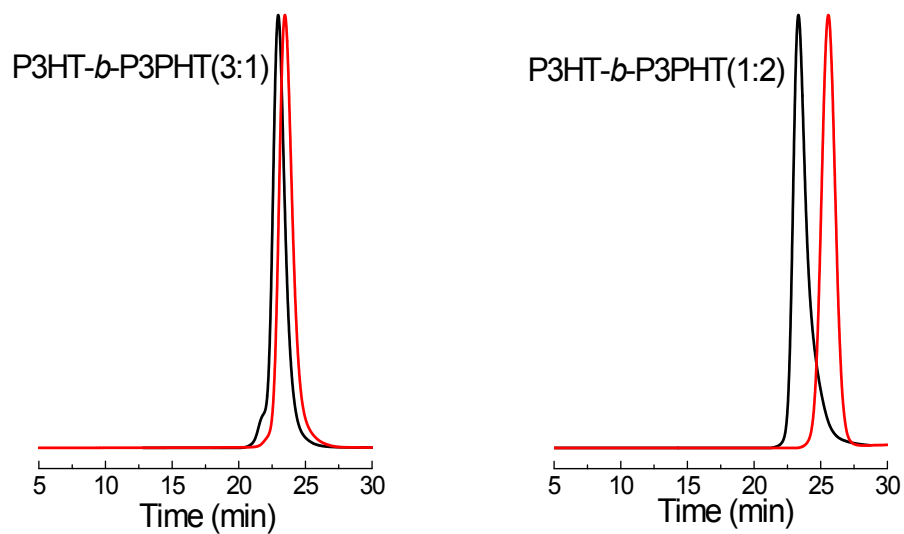

**Figure S1.** GPC profiles of P3HT-*b*-P3PHT diblock copolymers. Red line represents the GPC profile of P3HT in the first step and black line shows the GPC profile of P3HT-*b*-P3PHT (3:1) and P3HT-*b*-P3PHT(1:2).

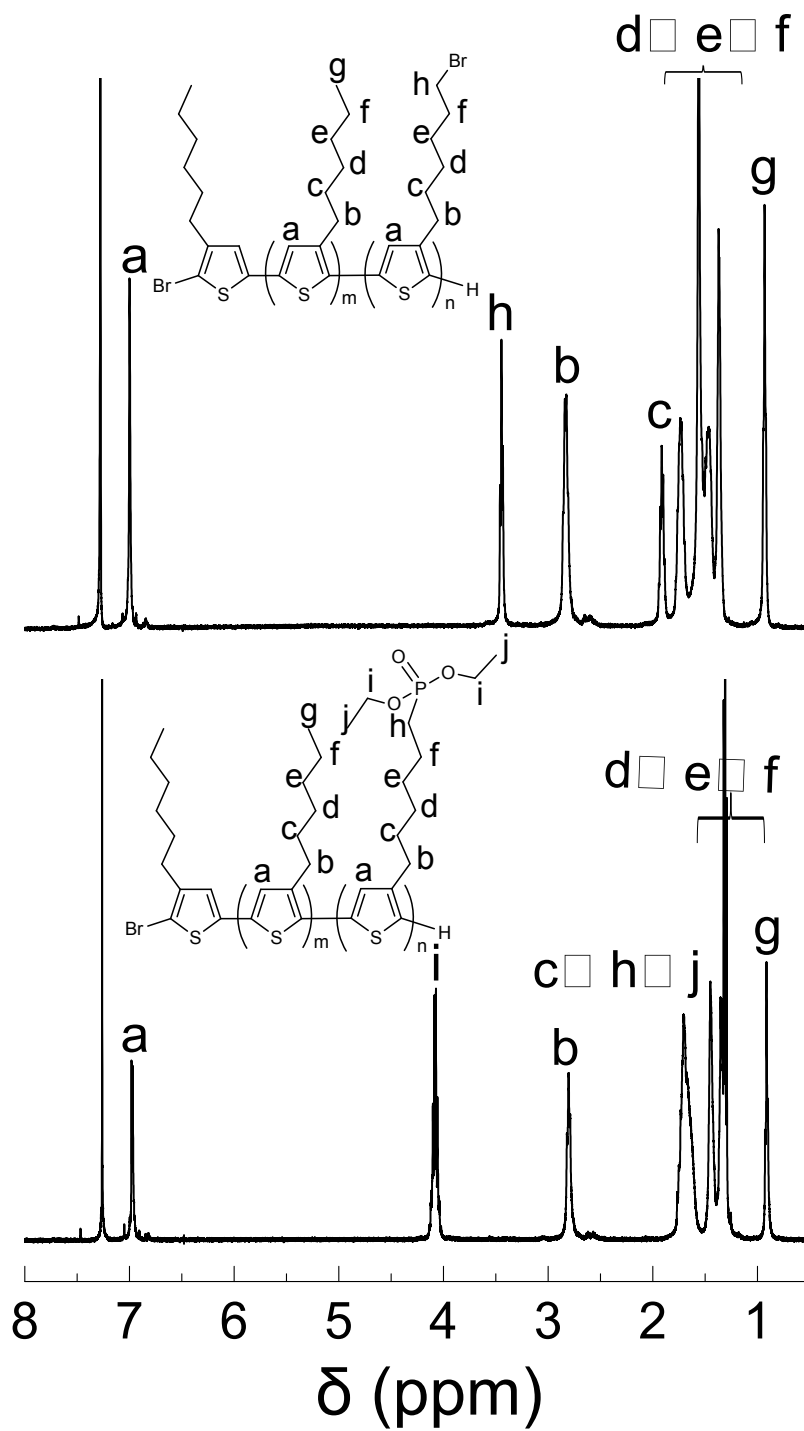

**Figure S2.**  $^1\text{H}$  NMR spectra of  $\text{P3HT-}b\text{-P3BrHT}$  and  $\text{P3HT-}b\text{-P3PHT}$  in  $\text{CDCl}_3$ .

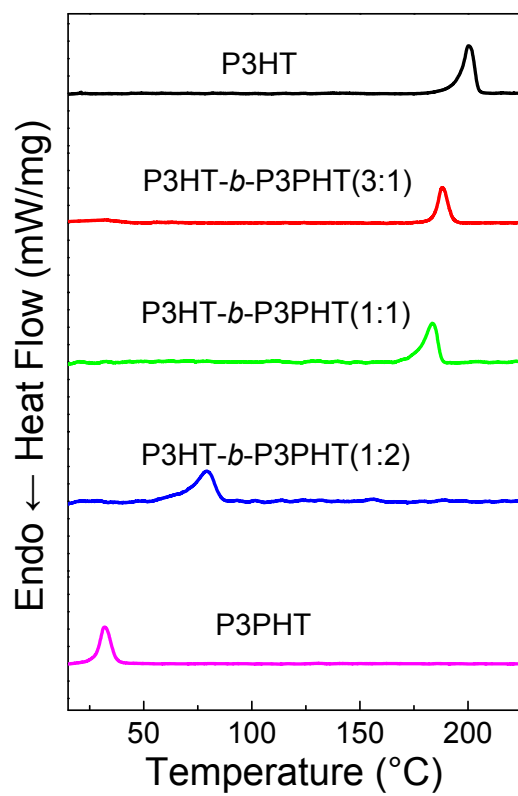

**Figure S3.** DSC exotherms of P3HT, P3PHT homopolymers and all the P3HT-*b*-P3PHT diblock copolymers.

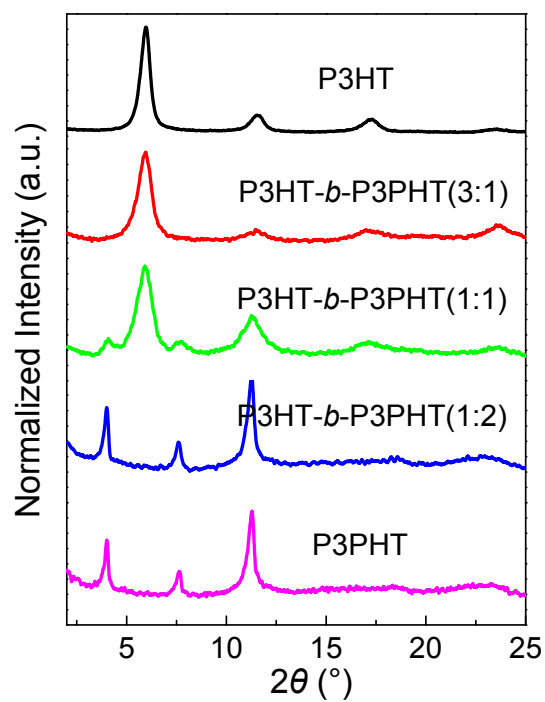

**Figure S4.** XRD profiles of P3HT, P3PHT, and P3HT-*b*-P3PHT diblock copolymers casted from 10 mg/ml solution dissolved in toluene.

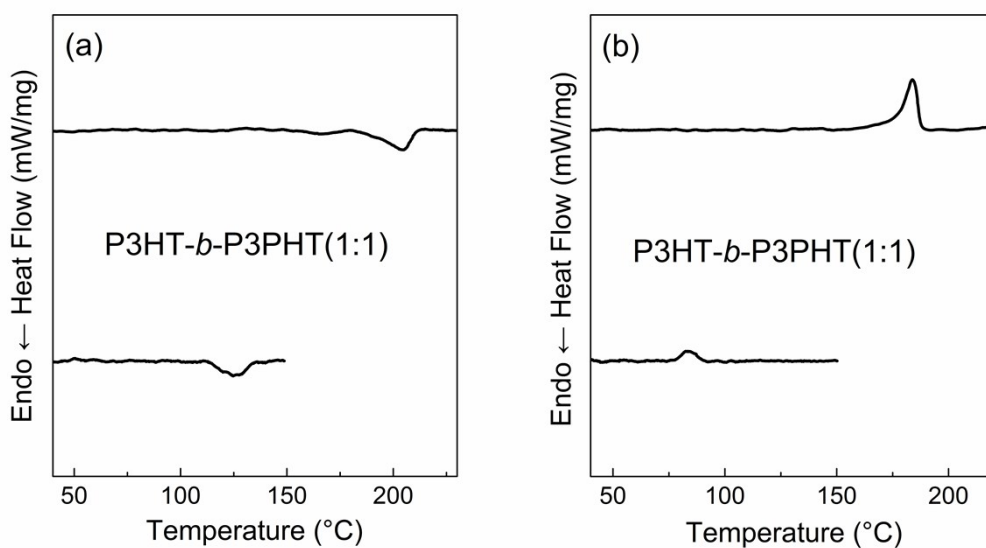

**Figure S5.** (a) DSC endotherms and (b) exotherms of P3HT-*b*-P3PHT (1:1) heated to 240 °C (upper line) or 150 °C (lower line).

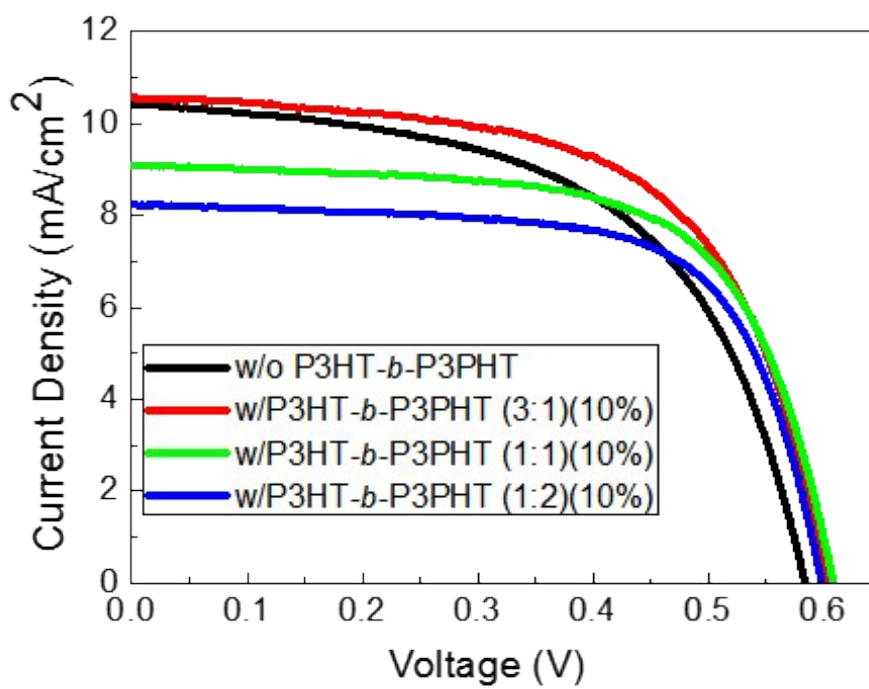

**Figure S6.** *J-V* characteristics of the P3HT:PC<sub>61</sub>BM reference photovoltaic device and P3HT:PC<sub>61</sub>BM blended with 10 wt% P3HT-*b*-P3PHT diblock copolymers.

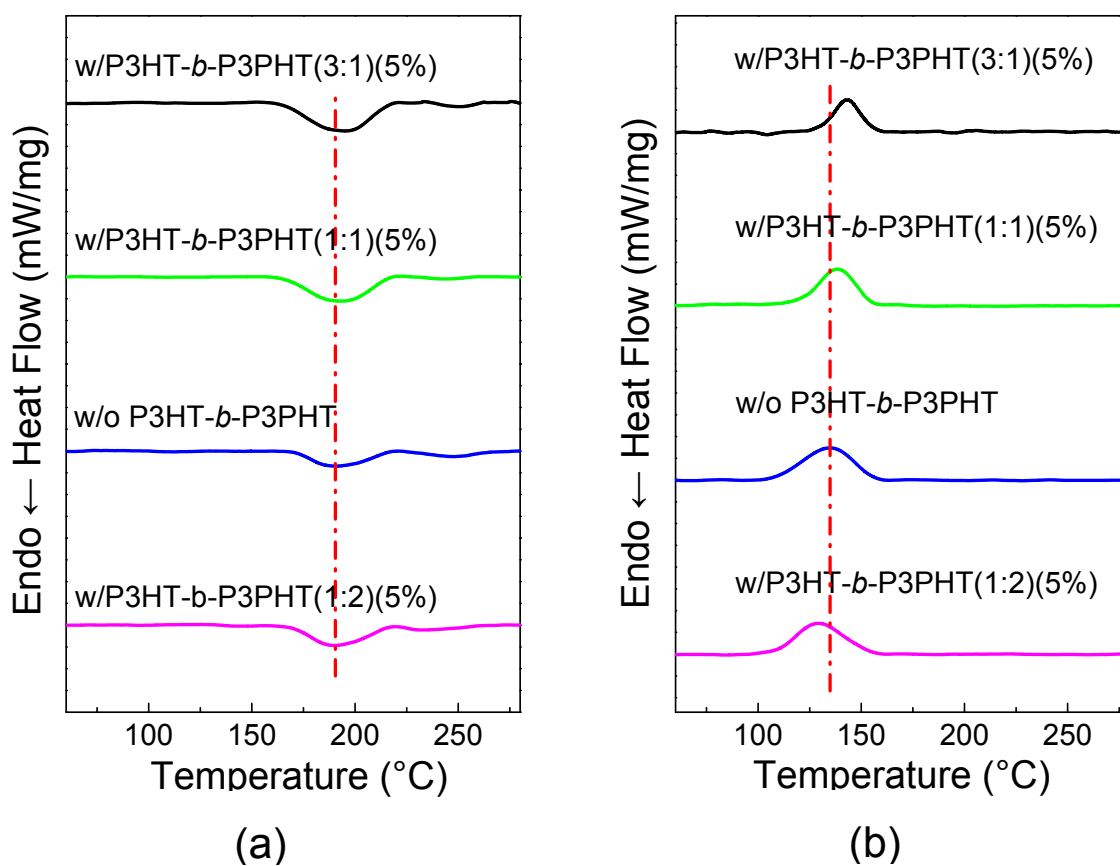

**Figure S7.** (a) DSC endotherms and (b) exotherms of P3HT:PC<sub>61</sub>BM and P3HT:PC<sub>61</sub>BM blended with 5% P3HT-*b*-P3PHT diblock copolymers.



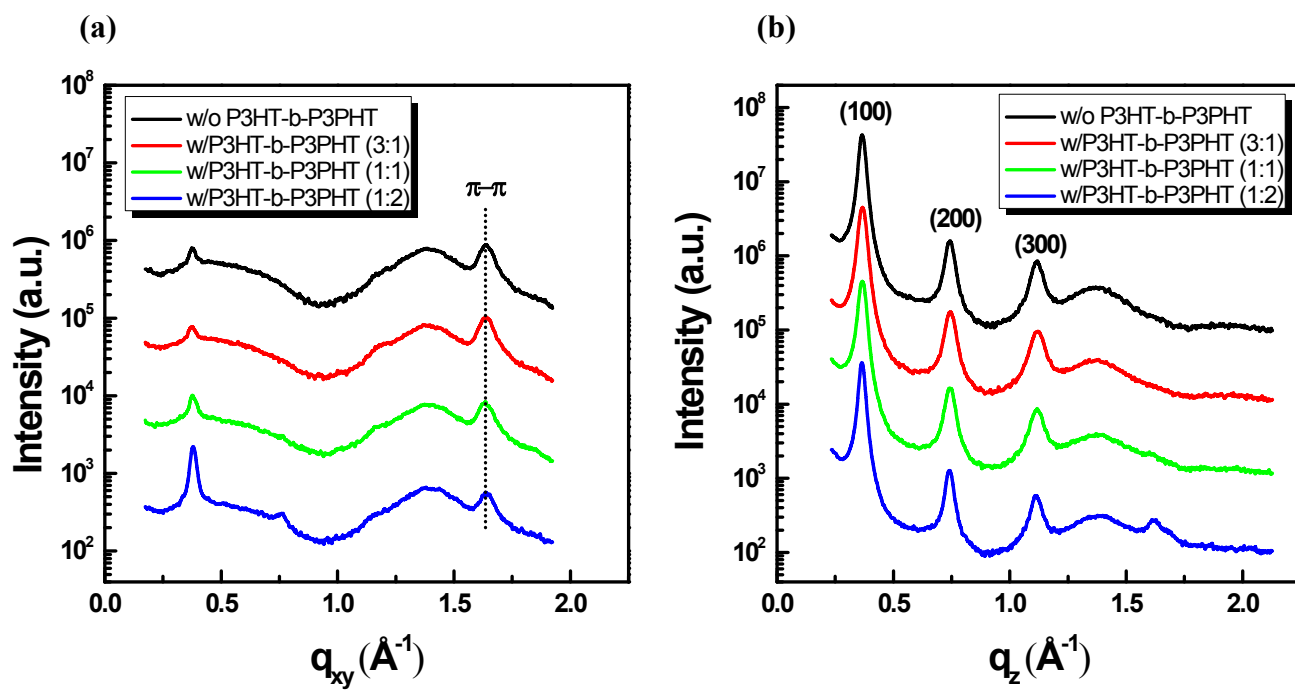

**Figure S8.** GIWAXS 1D profile of (a) in plane (b) out of plane of P3HT:PC<sub>61</sub>BM and P3HT:PC<sub>61</sub>BM blended with 5% P3HT-*b*-P3PHT diblock copolymers.

**Table S1.** Summary of Photovoltaic Characteristics of P3HT:PC<sub>61</sub>BM and P3HT:PC<sub>61</sub>BM Blended with 10 wt% P3HT-*b*-P3PHT Diblock Copolymers.

| Sample                       | $V_{oc}$ (V) | $J_{sc}$ (mA/cm <sup>2</sup> ) | $FF$ (%) | PCE (%) |
|------------------------------|--------------|--------------------------------|----------|---------|
| w/o P3HT- <i>b</i> -P3PHT    | 0.58         | 10.4                           | 55.8     | 3.39    |
| w/P3HT- <i>b</i> -P3PHT(3:1) | 0.60         | 10.6                           | 60.3     | 3.85    |
| w/P3HT- <i>b</i> -P3PHT(1:1) | 0.61         | 9.07                           | 65.6     | 3.62    |
| w/P3HT- <i>b</i> -P3PHT(1:2) | 0.60         | 8.23                           | 67.6     | 3.37    |

**Table S2.** Summary of Photovoltaic Characteristics of P3HT:PC<sub>61</sub>BM and P3HT:PC<sub>61</sub>BM Blended with 5 wt% P3HT-*b*-P3PHT Diblock Copolymers after Annealing at 150 °C for 90 min.

| Sample                       | $V_{oc}$ (V) | $J_{sc}$ (mA/cm <sup>2</sup> ) | $FF$ (%) | PCE (%)   |
|------------------------------|--------------|--------------------------------|----------|-----------|
| w/o P3HT- <i>b</i> -P3PHT    | 0.59±0.01    | 7.33±0.18                      | 51.7±1.2 | 2.21±0.11 |
| w/P3HT- <i>b</i> -P3PHT(3:1) | 0.60±0.01    | 8.87±0.53                      | 58.7±3.9 | 3.14±0.13 |
| w/P3HT- <i>b</i> -P3PHT(1:1) | 0.60±0.01    | 8.82±0.15                      | 66.9±1.5 | 3.53±0.05 |
| w/P3HT- <i>b</i> -P3PHT(1:2) | 0.59±0.01    | 8.97±0.33                      | 64.2±1.3 | 3.47±0.06 |
